# Supplementary material for: OMI air-quality monitoring over the Middle East
Source: Copernicus journal article supplement (doi:10.5194/acp-17-4687-2017), 2017-04-11
Supplement: Supplementary file 2 [file acp-17-4687-2017-supplement.zip]

Archive with 4 entries (4 files):
- Supplementary-Material.pdf
- TABLE-S1-RANKED-POLLUTION-LEVELS.xlsx
- TABLE-S2-RANKED-POLLUTION-TRENDS.xlsx
- acp-17-4687-2017-supplement-title-page.pdf
