# Supplementary material for: OMI air-quality monitoring over the Middle East
Source: Copernicus journal article supplement (doi:10.5194/acp-17-4687-2017), 2017-04-11
Supplement: Supplementary file 2 [file acp-17-4687-2017-supplement.zip › acp-17-4687-2017-supplement-title-page.pdf]

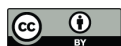

## *Supplement of*

# **OMI air-quality monitoring over the Middle East**

**Michael P. Barkley et al.**

*Correspondence to:* Michael P. Barkley ([mpb14@le.ac.uk](mailto:mpb14@le.ac.uk))

- [acp-17-4687-2017-supplement-title-page.pdf](#)
- [Supplementary-Material.pdf](#)
- [TABLE-S1-RANKED-POLLUTION-LEVELS.xlsx](#)
- [TABLE-S2-RANKED-POLLUTION-TRENDS.xlsx](#)

The copyright of individual parts of the supplement might differ from the CC-BY 3.0 licence.
